# Supplementary material for: Bacillus subtilis PS-216 Antagonistic Activities against Campylobacter jejuni NCTC 11168 Are Modulated by Temperature, Oxygen, and Growth Medium
Source: MDPI journal article supplement (doi:10.3390/microorganisms10020289), 2022-01-26
Supplement: s1 [file s1]

Supplementary information

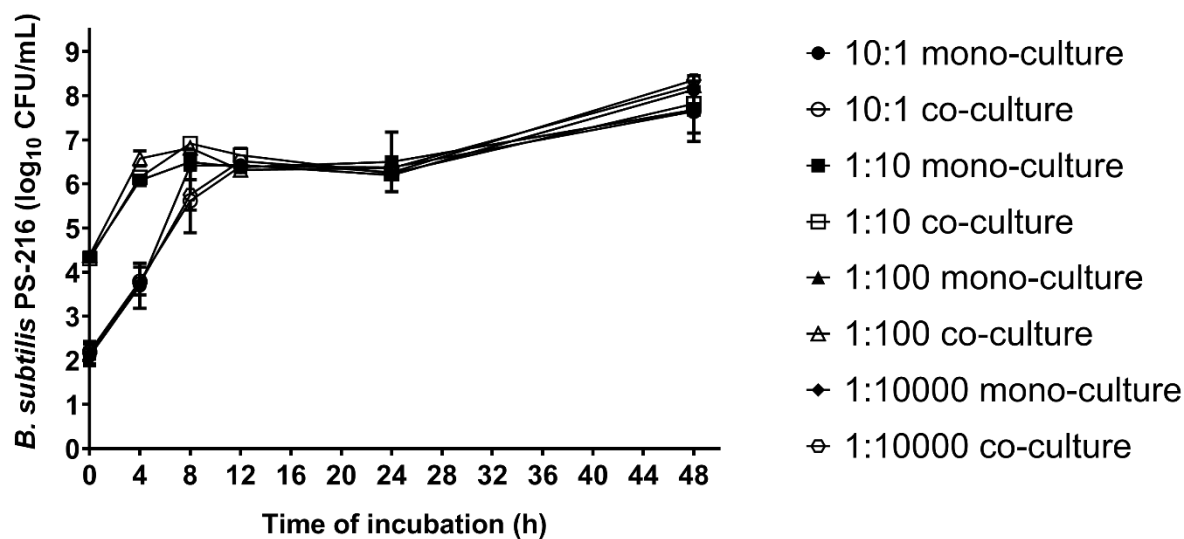

**Figure S1.** Growth of *B. subtilis* PS-216 in mono-culture and in co-culture with *C. jejuni* 11168, in 10:1 in favor of *B. subtilis*, and 1:10, 1:100 and 1:10000 in favor of *C. jejuni* in the starting inoculum in MH broth at 42°C in microaerophilic conditions, presented as  $\log_{10}\text{CFU/mL} \pm$  standard deviation of three replicas.

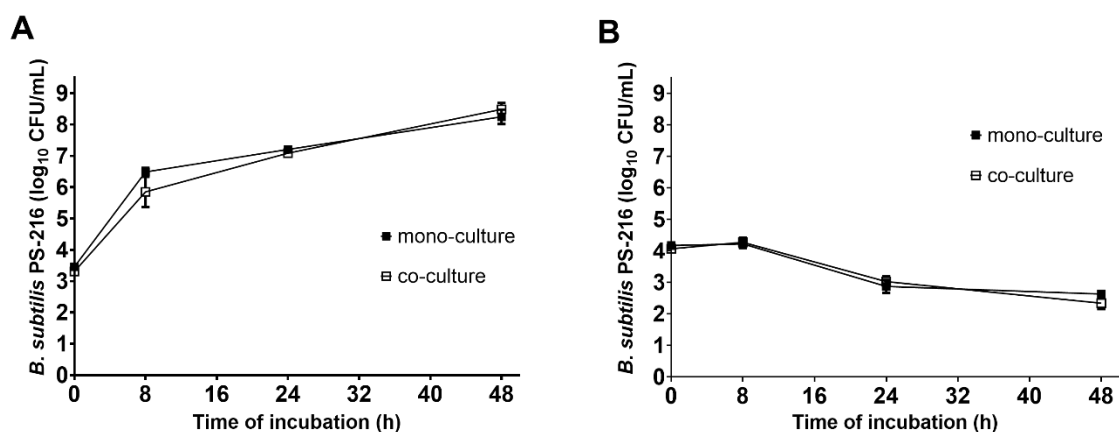

**Figure S2.** Growth of *B. subtilis* PS-216 in sterile chicken litter medium (A) and sterile intestinal content medium (B), in mono-culture (full symbols) and co-culture (empty symbols), presented as  $\log_{10}\text{CFU/mL} \pm$  standard deviation of three replicas.
